# Supplementary material
Source: PubMed Central journal article supplement (PMC2075540)
Supplement: jphysiol_2006.125005_1.pdf [file jphysiol_2006.125005_1.pdf]

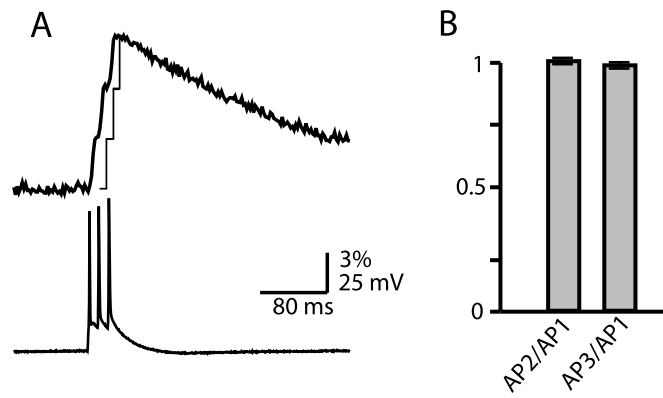

Supplemental Fig. 1

The measurement of  $Ca^{2+}$ -signals during a burst of 3 bAPs was in the linear range of the indicator dye. (A)  $[Ca^{2+}]_i$ -signals (top) related to a burst of 3 spikes evoked at 100 Hz (bottom). (B) Relative amplitudes of  $[Ca^{2+}]_i$ -signals corresponding to the second and the third bAP normalized to the size of the first spike (n=4).
